# Supplementary material
Source: Research Square preprint supplement (doi:10.21203/rs.3.rs-10021369/v1)
Supplement: Supplementary file 1 [file 909692831222e1412cd2ec3a.docx]

**Supplementary Information — The energy transition is relocating geopolitical price risk from fuels to critical materials**

Abdulla Al-Haddad, College of Science and Engineering, Hamad Bin Khalifa University, Doha, Qatar

**Supplementary Table 1.** Event chronology and classification. Market date is the first trading day on or after the event. Classification rules in Methods; primary sources: MOFCOM/GACC announcements compiled by Global Trade Alert (coercion); contemporaneous wire reports (military). The 1 January 2026 silver/rare-earth catalogue enters only the extreme-day attribution analysis; the January 2026 week is excluded from all formal class tests as a confounded window.

| **#** | **Class** | **Market date** | **Event** |
| --- | --- | --- | --- |
| M1 | Military-conflict | 2018-05-08 | US withdraws from JCPOA |
| M2 | Military-conflict | 2019-09-16 | Abqaiq–Khurais attack (14 Sep, Sat) |
| M3 | Military-conflict | 2020-01-03 | Soleimani strike |
| M4 | Military-conflict | 2022-02-24 | Russia invades Ukraine |
| M5 | Military-conflict | 2023-10-09 | Hamas attack on Israel (7 Oct, Sat) |
| M6 | Military-conflict | 2023-11-20 | Galaxy Leader seizure opens Red Sea crisis (19 Nov, Sun) |
| M7 | Military-conflict | 2024-04-15 | Iran direct strike on Israel (13 Apr, Sat) |
| M8 | Military-conflict | 2024-10-01 | Iran ballistic-missile attack on Israel |
| M9 | Military-conflict | 2025-06-13 | Israel attacks Iran (Twelve-Day War begins) |
| M10 | Military-conflict | 2025-06-23 | US strikes Iranian nuclear sites (22 Jun, Sun) |
| M11 | Military-conflict | 2026-01-05 | US strikes Venezuela; Maduro captured (3 Jan, Sat) |
| G1 | Geoeconomic-coercion | 2018-07-06 | First US Section 301 tariffs take effect |
| G2 | Geoeconomic-coercion | 2019-08-01 | US announces 10% tariff on residual China imports |
| G3 | Geoeconomic-coercion | 2023-07-03 | China: Ga/Ge export licensing |
| G4 | Geoeconomic-coercion | 2023-10-20 | China: graphite export licensing |
| G5 | Geoeconomic-coercion | 2024-08-15 | China: antimony export licensing |
| G6 | Geoeconomic-coercion | 2024-12-03 | China: Ga/Ge/Sb export ban to US |
| G7 | Geoeconomic-coercion | 2025-02-04 | China: W/Te/Bi/Mo/In controls + retaliatory tariffs |
| G8 | Geoeconomic-coercion | 2025-04-03 | US 'Liberation Day' tariffs (2 Apr, post-close) + China RE controls (4 Apr) |
| G9 | Geoeconomic-coercion | 2025-10-09 | China: RE control expansion (0.1% de minimis) + US 100% tariff threat (10 Oct) |
| G10* | Geoeconomic-coercion | 2026-01-02 | China: silver and RE-compound licensing catalogue (eff. 1 Jan 2026; attribution analysis only) |
| D1 | De-escalation | 2025-11-07 | US–China truce: controls suspended |
| D2 | De-escalation | 2025-06-24 | Israel–Iran ceasefire |

**Supplementary Table 2.** Fuel→metal spillover (F2M, average % of metals' forecast-error variance from fossil-fuel shocks) by era and specification. E5 is the minimum in every row.

| **Specification** | **E1** | **E2** | **E3** | **E4** | **E5** |
| --- | --- | --- | --- | --- | --- |
| baseline H=10, p=1 | 2.35 | 2.81 | 2.86 | 5.15 | 2.16 |
| H=5 | 2.35 | 2.81 | 2.86 | 5.15 | 2.16 |
| H=20 | 2.35 | 2.81 | 2.86 | 5.15 | 2.16 |
| VAR(2) | 2.73 | 3.87 | 2.92 | 4.53 | 2.28 |
| weekly | 3.63 | 7.77 | 7.99 | 10.80 | 2.94 |

**Supplementary Table 3.** Event-class test, full statistics: mean absolute standardized abnormal returns by class, both horizons, with two-sided permutation p-values (5,000 permutations).

| **Asset** | **h** | **Mean |z| military** | **Mean |z| coercion** | **Difference** | **Permutation p** |
| --- | --- | --- | --- | --- | --- |
| Brent crude | (0,1) | 0.99 | 0.92 | +0.07 | 0.803 |
| Brent crude | (0,5) | 1.03 | 0.96 | +0.07 | 0.719 |
| TTF gas | (0,1) | 1.50 | 0.58 | +0.92 | 0.031 |
| TTF gas | (0,5) | 1.27 | 0.75 | +0.52 | 0.156 |
| Fossil index | (0,1) | 1.52 | 0.75 | +0.77 | 0.066 |
| Fossil index | (0,5) | 1.44 | 0.91 | +0.53 | 0.170 |
| Global-metals index | (0,1) | 0.53 | 1.13 | -0.60 | 0.062 |
| Global-metals index | (0,5) | 0.41 | 0.65 | -0.24 | 0.201 |
| China-metals index | (0,1) | 0.51 | 0.74 | -0.23 | 0.267 |
| China-metals index | (0,5) | 0.37 | 0.63 | -0.27 | 0.059 |
| Copper | (0,1) | 0.54 | 1.23 | -0.70 | 0.089 |
| Copper | (0,5) | 0.44 | 0.67 | -0.23 | 0.164 |

**Supplementary Table 4.** Material-cost-at-risk by technology and era: 95th percentile of 6-month basket cost changes; 90% stationary-bootstrap CIs; maximum realized 6-month rise; annualized basket volatility; and E5 ranges under ±25% intensity perturbation.

| **Technology basket** | **Era** | **CaR95 (%)** | **Bootstrap 90% CI** | **Max realized 6m rise (%)** | **Ann. vol (%)** |
| --- | --- | --- | --- | --- | --- |
| EV (per vehicle) | E1 | 28.0 | [12.0, 33.2] | 30.4 | 10.4 |
| EV (per vehicle) | E2 | 3.4 | [-13.7, 16.4] | 5.7 | 13.4 |
| EV (per vehicle) | E3 | 48.9 | [30.5, 82.9] | 70.2 | 15.0 |
| EV (per vehicle) | E4 | 9.6 | [-13.4, 83.7] | 22.3 | 22.5 |
| EV (per vehicle) | E5 | 17.3 | [-2.2, 29.7] | 24.8 | 13.5 |
| Offshore wind (per MW) | E1 | 23.5 | [10.6, 39.9] | 27.8 | 15.8 |
| Offshore wind (per MW) | E2 | 7.5 | [-1.3, 19.9] | 11.8 | 14.2 |
| Offshore wind (per MW) | E3 | 33.3 | [17.6, 48.8] | 38.6 | 19.7 |
| Offshore wind (per MW) | E4 | 17.1 | [-5.2, 32.4] | 22.5 | 20.5 |
| Offshore wind (per MW) | E5 | 24.2 | [11.9, 38.6] | 34.0 | 16.6 |
| Onshore wind (per MW) | E1 | 22.7 | [13.0, 38.6] | 28.0 | 15.7 |
| Onshore wind (per MW) | E2 | 7.8 | [-2.9, 20.4] | 12.5 | 14.1 |
| Onshore wind (per MW) | E3 | 29.3 | [17.5, 43.8] | 33.3 | 17.8 |
| Onshore wind (per MW) | E4 | 16.6 | [-6.7, 39.4] | 21.8 | 22.3 |
| Onshore wind (per MW) | E5 | 20.8 | [10.7, 34.2] | 28.3 | 15.3 |
| Solar PV (per MW) | E1 | 24.0 | [8.0, 44.9] | 26.8 | 13.6 |
| Solar PV (per MW) | E2 | 5.2 | [-0.3, 18.8] | 8.9 | 12.6 |
| Solar PV (per MW) | E3 | 65.0 | [20.2, 127.7] | 102.0 | 24.5 |
| Solar PV (per MW) | E4 | 14.2 | [-8.9, 24.1] | 18.8 | 18.4 |
| Solar PV (per MW) | E5 | 24.0 | [9.7, 35.3] | 34.8 | 16.5 |
| EV (per vehicle) | E5 ±25% intensity perturbation | 13.7–21.1 |  |  |  |
| Offshore wind (per MW) | E5 ±25% intensity perturbation | 22.9–25.2 |  |  |  |
| Onshore wind (per MW) | E5 ±25% intensity perturbation | 19.4–21.9 |  |  |  |
| Solar PV (per MW) | E5 ±25% intensity perturbation | 22.5–24.9 |  |  |  |

**Supplementary Table 5.** Extreme-day attribution (|return| > 2.5 conditional s.d.) by group, era, and event class, with E5 event-window base rates. Exact binomial tests (E5): exchange metals after coercion 16/129, p<0.0001; after military 2/129, p=0.91; fossil after military 7/49, p=0.0007; fossil after coercion 6/49, p=0.0074; policy-targeted after coercion 2/95, p=0.85 (appraisal smoothing suppresses single-day jumps; see Fig. 2b for multi-day responses).

| **Group** | **Era** | **Extreme days** | **After military (%)** | **After coercion (%)** | **Contested (%)** |
| --- | --- | --- | --- | --- | --- |
| China-assessed metals | E1 | 160 | 0.6 | 0.0 | 0.0 |
| China-assessed metals | E2 | 106 | 0.0 | 8.5 | 0.0 |
| China-assessed metals | E3 | 145 | 0.0 | 0.0 | 0.0 |
| China-assessed metals | E4 | 109 | 0.0 | 0.0 | 0.0 |
| China-assessed metals | E5 | 202 | 4.0 | 1.5 | 0.5 |
| Exchange metals | E1 | 111 | 0.0 | 0.0 | 0.0 |
| Exchange metals | E2 | 74 | 0.0 | 2.7 | 0.0 |
| Exchange metals | E3 | 121 | 0.0 | 0.0 | 0.0 |
| Exchange metals | E4 | 86 | 0.0 | 0.0 | 0.0 |
| Exchange metals | E5 | 129 | 1.6 | 12.4 | 3.1 |
| Fossil fuels | E1 | 40 | 0.0 | 0.0 | 0.0 |
| Fossil fuels | E2 | 40 | 5.0 | 7.5 | 0.0 |
| Fossil fuels | E3 | 50 | 2.0 | 0.0 | 0.0 |
| Fossil fuels | E4 | 28 | 7.1 | 0.0 | 0.0 |
| Fossil fuels | E5 | 49 | 14.3 | 12.2 | 2.0 |
| Policy-targeted (Ga, Mo, RE) | E1 | 63 | 0.0 | 0.0 | 0.0 |
| Policy-targeted (Ga, Mo, RE) | E2 | 50 | 0.0 | 10.0 | 0.0 |
| Policy-targeted (Ga, Mo, RE) | E3 | 61 | 0.0 | 0.0 | 0.0 |
| Policy-targeted (Ga, Mo, RE) | E4 | 56 | 0.0 | 0.0 | 0.0 |
| Policy-targeted (Ga, Mo, RE) | E5 | 95 | 4.2 | 2.1 | 1.1 |
| Event-window base rate (E5) | E5 | — | 3.1 | 3.5 | — |

**Supplementary Table 6.** Technology basket weights (IEA 2021 per-unit intensities, panel-covered minerals; LI = battery-grade lithium carbonate equivalent, kg) and share of IEA-listed mineral mass covered.

| **Technology** | **Mineral weights (kg per unit)** | **IEA mass coverage (%)** |
| --- | --- | --- |
| EV (per vehicle) | CU: 53.2; LI: 47.4; NI: 39.9; CO: 13.3; ZN: 0.1; RE: 0.5 | 56.0 |
| Offshore wind (per MW) | CU: 8000.0; ZN: 5500.0; CR: 525.0; NI: 240.0; RE: 239.0; MO: 109.0 | 94.8 |
| Onshore wind (per MW) | CU: 2900.0; ZN: 5500.0; CR: 470.0; NI: 403.5; MO: 99.0; RE: 14.0 | 92.3 |
| Solar PV (per MW) | CU: 2822.1; SI: 3948.3; ZN: 30.0; NI: 1.3 | 99.5 |

Mineral codes: CU copper; AL aluminium; PB lead; ZN zinc; NI nickel; AG silver; PT platinum; PD palladium; CR chrome; CO cobalt; GA gallium; MO molybdenum; VA vanadium; SI silicon; LI lithium carbonate; RE rare-earth carbonate.
